# Supplementary material for: Amyloid formation of bovine insulin is retarded in moderately acidic pH and by addition of short-chain alcohols
Source: PubMed Central journal article supplement (PMC7069927; doi:10.1007/s00249-019-01420-0), 2020-01-04
Supplement: 249_2019_1420_MOESM1_ESM.pdf [file 249_2019_1420_MOESM1_ESM.pdf]

Supporting Information to:

# Amyloid formation of bovine insulin is retarded in moderately acidic pH and by addition of short-chain alcohols

David Bernson<sup>1,§</sup>, Almedina Mecinovic<sup>1,§</sup>, Md Tuhin Abed<sup>1</sup>, Fredrik Limé<sup>2</sup>, Per Jageland<sup>2</sup>, Magnus Palmlöf<sup>2</sup>, Elin K. Esbjörner<sup>1,\*</sup>

<sup>1</sup>Division of Chemical Biology, Department of Biology and Biological Engineering, Chalmers University of Technology, Kemivägen 10, 412 96 Gothenburg, Sweden

<sup>2</sup>Noyron Pulp and Performance Chemicals AB, Separation Products, SE 445 80 Bohus, Sweden

<sup>§</sup>shared first authors

\*Corresponding author: email: [eline@chalmers.se](mailto:eline@chalmers.se), phone: +46-31-772 5120; ORCID: 0000-0002-1253-6342

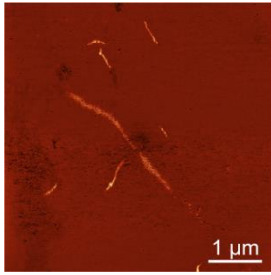

*Atomic force microscopy imaging of insulin aggregated in ammonium acetate, pH 4.0 in presence of 30% (vol/vol) EtOH. The sample was diluted 100 times before deposited on the mica surface. Fibrillar species with typical amyloid morphology are present. The scale bar is 1  $\mu\text{m}$ .*
